# Supplementary material for: A facile strategy to enable nanoparticles for simultaneous phase transfer, folate receptor targeting, and cisplatin delivery
Source: Royal Society of Chemistry journal article supplement (doi:10.1039/c4ra11582a), 2014-10-27
Supplement: c4ra11582a1.pdf [file c4ra11582a1.pdf]

## Facile Strategy to Enable Nanoparticles for Simultaneous Phase Transfer, Folate Receptor Targeting, and Cisplatin Delivery

Mochamad Zakki Fahmi and Jia-Yaw Chang\*

Department of Chemical Engineering, National Taiwan University of Science and Technology, Taipei 106, Taiwan, Republic of China

\*Corresponding Author: [jychang@mail.ntust.edu.tw](mailto:jychang@mail.ntust.edu.tw)

### Supporting Information:

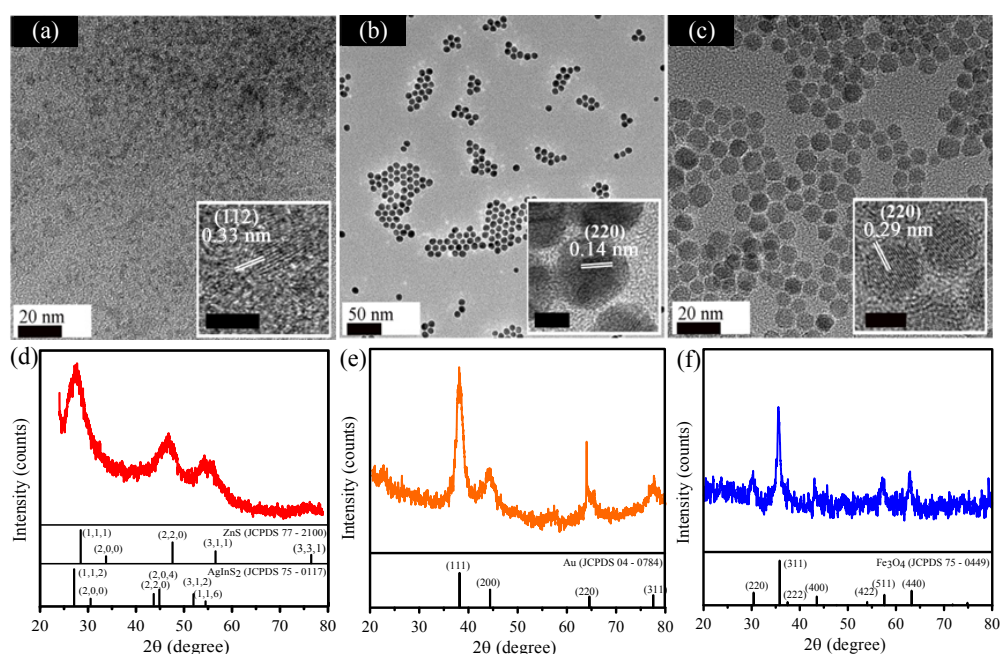

**Figure S1.** TEM images of (a) AQD, (b) GNP, and (c) FNP. The insets with lattice fringes show high-resolution TEM images of the corresponding nanoparticles; it can be seen that they are crystalline. The scale bar is 2 nm. XRD patterns of as-prepared AQD (d), GNP (e), and FNP (f). XRD patterns of (d) AgInS<sub>2</sub> (JCPDS 75-0117) and ZnS (JCPDS 77-2100); (e) Au (JCPDS 04-0784); (f) Fe<sub>3</sub>O<sub>4</sub> (JCPDS 75-0449) are also shown as reference.

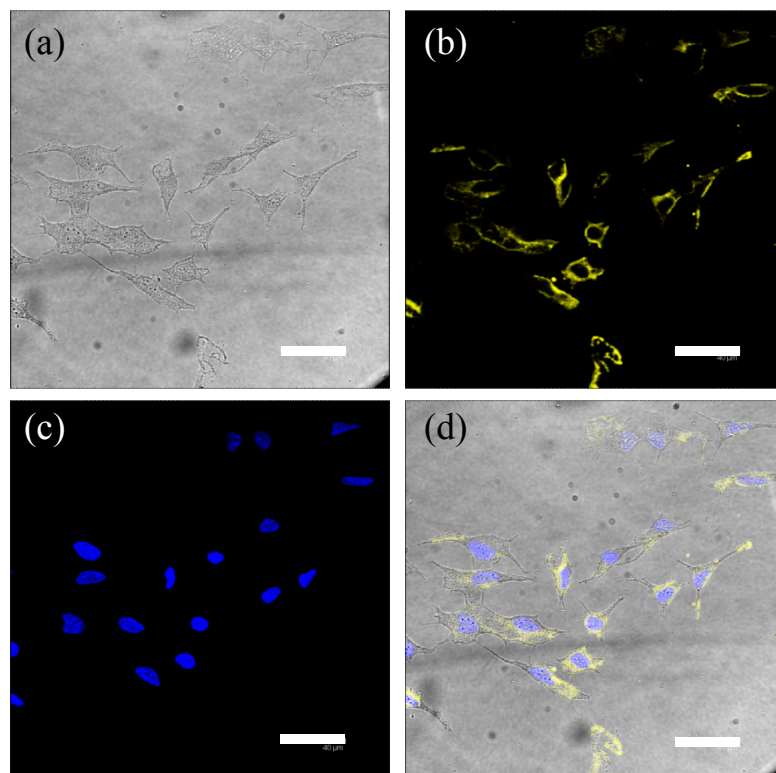

**Figure S2.** Confocal laser images of HeLa cells treated with AQD@folate: (a) transmission image and luminescent images containing, (b) yellow emission of AQD@folate, (c) blue emission of DAPI, and (d) an overlay of (a)–(c). Scale bars represent 40  $\mu\text{m}$ .

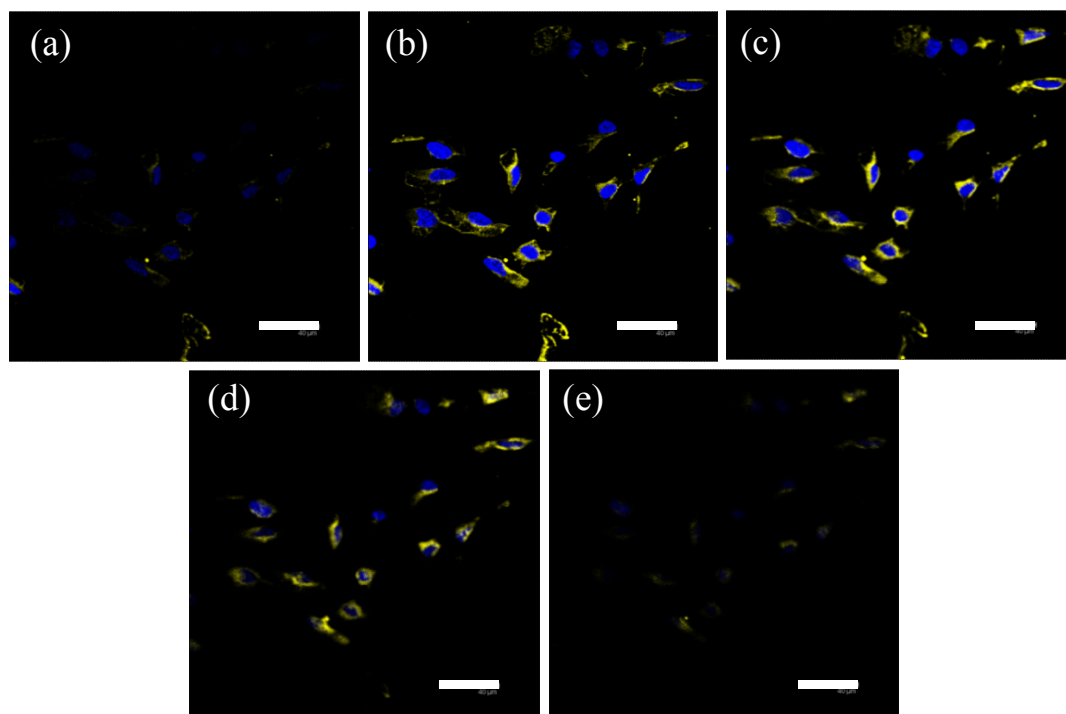

**Figure S3.** Confocal microscopy Z-stack sectioning of HeLa cancer cells treated with AQD@folate for 2 h, fixed with alcohol, and subsequently stained with DAPI. Slices were taken from the top (a) to the bottom (e) of the HeLa cells; consecutive images in each column are separated by 2  $\mu\text{m}$ . Yellow fluorescence originates AQD@folate and blue emission at 460 nm, showing the location of the HeLa cell nuclei. Scale bars represent 40  $\mu\text{m}$ .

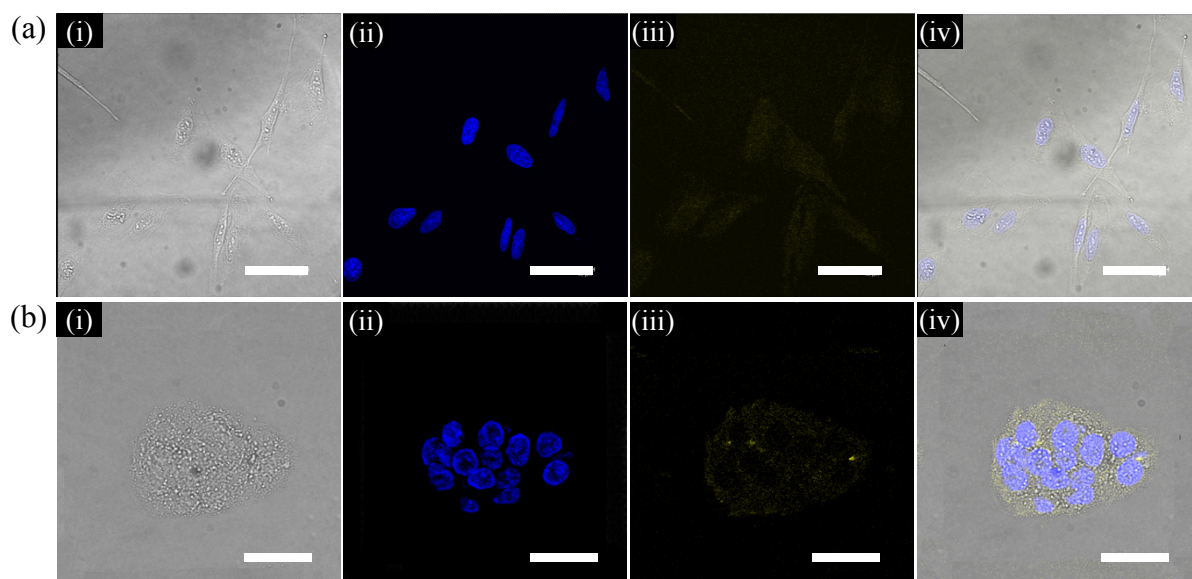

**Figure S4.** Confocal laser images of HeLa cells treated with AQD@OA (a) and HepG2 cell treated with AQD@folate/CDDP (b). Series of images consists : (i) transmission image and luminescent images containing (ii) blue emission of DAPI as well as (iii) yellow emission of AQD@OA, and (iv) an overlay of (i)–(iii). Scale bars represent 40  $\mu\text{m}$ .

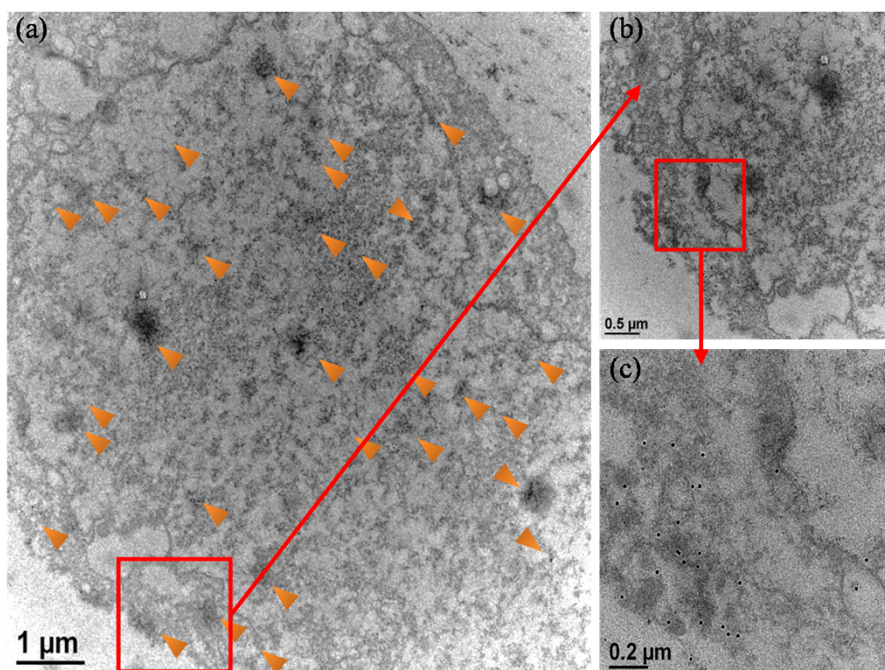

**Figure S5.** (a) TEM images showing the internalization of GNP@folate into HeLa cells. (b) and (c) High-magnification images of the area delimited by the square in panels (a) and (b), respectively. Brown arrows indicate the presence of GNP@folate nanoparticles.

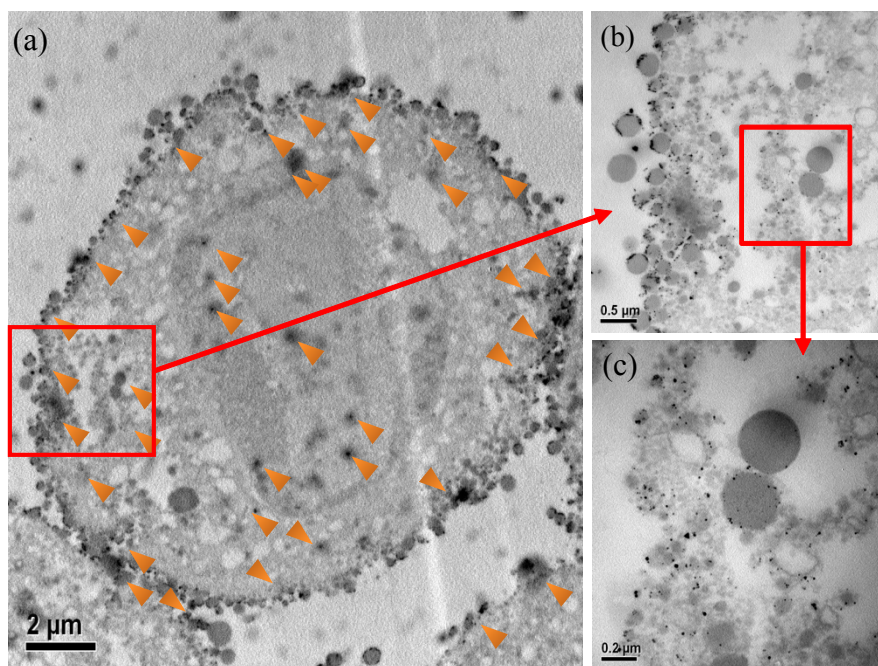

**Figure S6.** (a) TEM images showing the internalization of FNP@folate into HeLa cells. (b) and (c) High-magnification images of the area delimited by the square in panels (a) and (b), respectively. Brown arrows indicate the presence of FNP@folate nanoparticles.

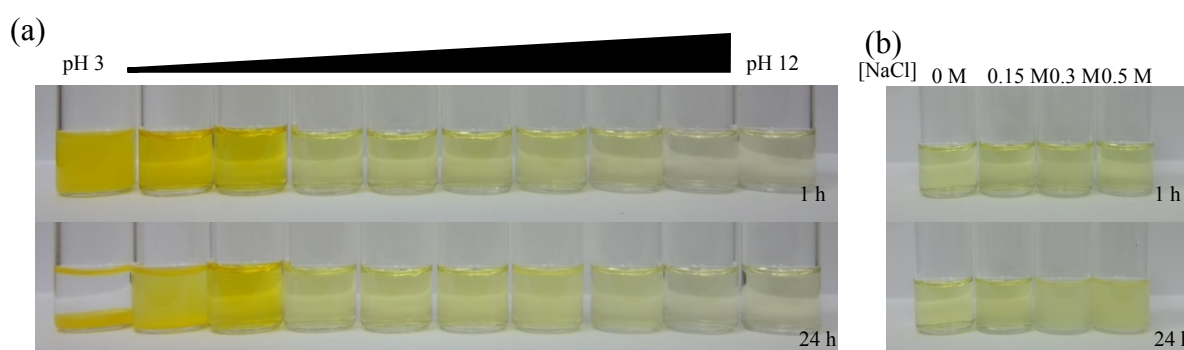

**Figure S7.** (a) The photograph images of AQD@folate in aqueous solutions of varying pH (from 3 to 12) at room temperature after storing for 24 h. (b) The photograph images of AQD@folate dispersed in pH 7 solutions containing different NaCl concentrations (from left to right: 0 M, 0.15 M, 0.3 M, and 0.5 M) after storing for 24 h.

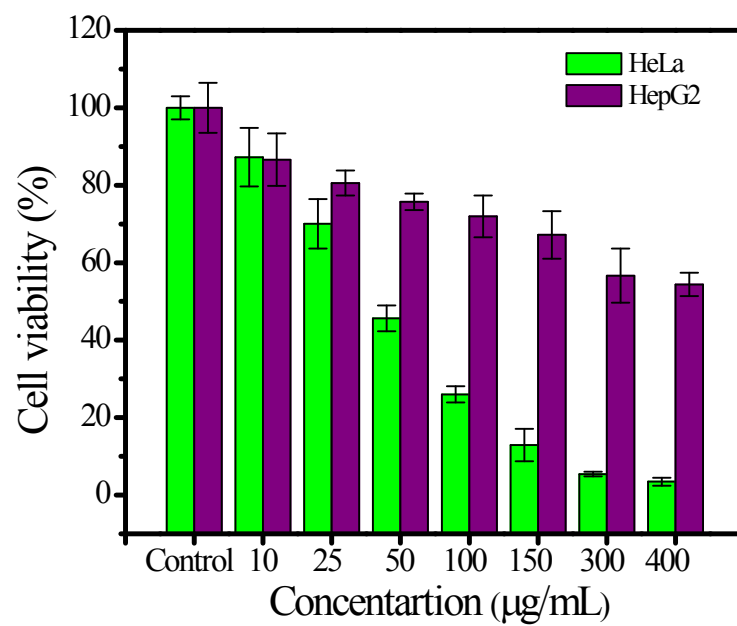

**Figure S8.** Comparison cell viability graphs of HeLa and HepG2 cancer cells after 24 h incubation with ACD@folate/CDDP

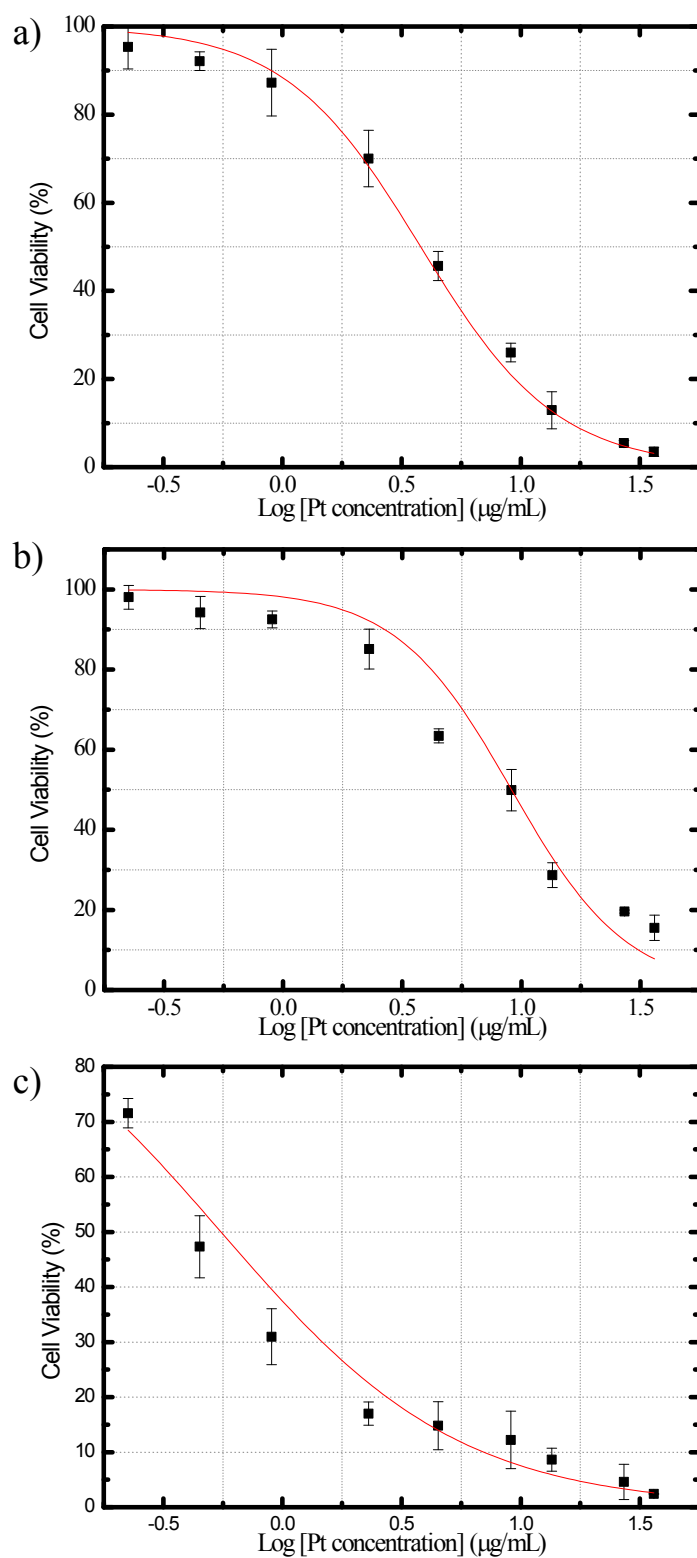

**Figure S9.** Cell viability graphs of HeLa cancer cells after 24 h incubation with (a) AQD@folate/CDDP, (b) AQD@CDDP, and (c) free CDDP. IC<sub>50</sub> values can be determined on red fitted curve, which showed at 0.169 µg/mL, 0.455 µg/mL, and -0.565 µg/mL, respectively, for each log [Pt concentration] or 1.477 µg/mL, 2.856 µg/mL, and 0.272 µg/mL, respectively, for each [Pt concentration].
